# Supplementary material for: Polar Wax as Adhesion Promoter in Polymeric Blend Films for Durable Photovoltaic Encapsulants
Source: MDPI journal article supplement (doi:10.3390/ma15196751), 2022-09-29
Supplement: s1 [file s1]

## Supplementary Information

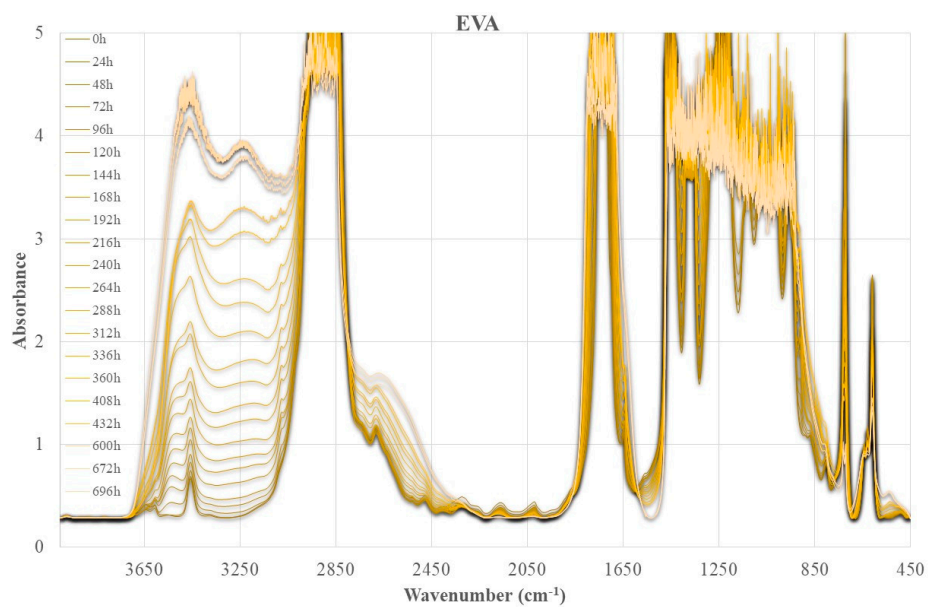

Figure S1. FTIR spectra of EVA at different exposure times

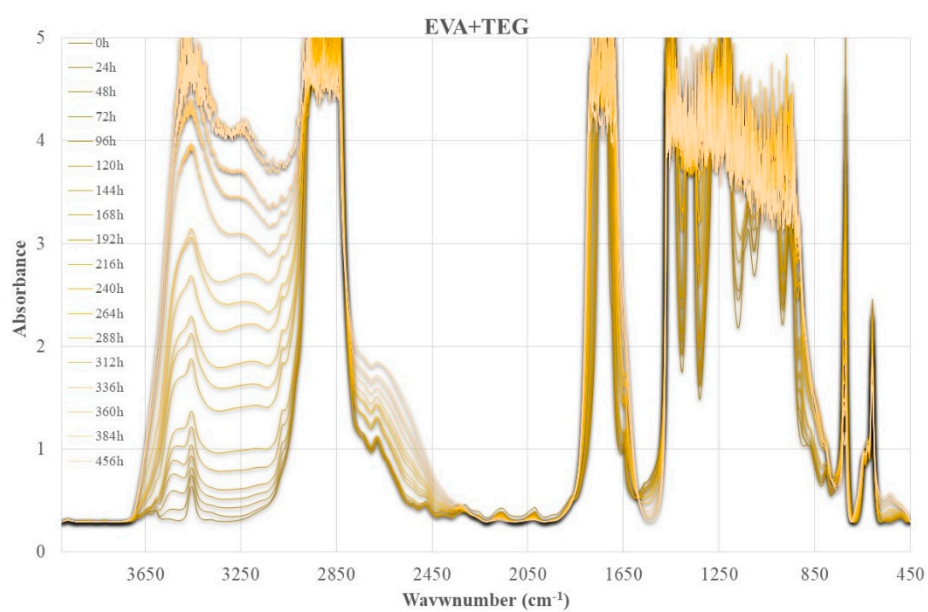

Figure S2. FTIR spectra of EVA+TEG at different exposure times

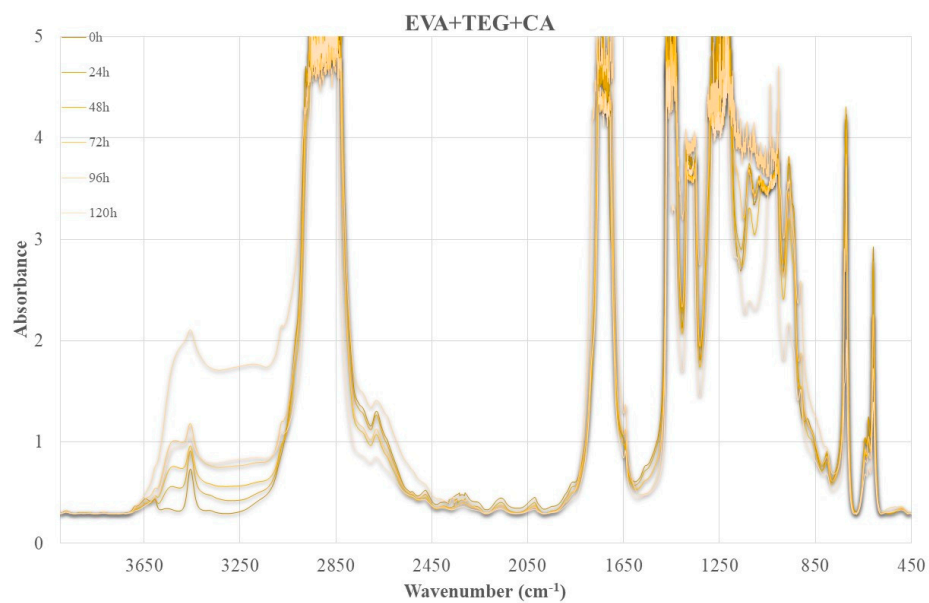

Figure S3. FTIR spectra of EVA+TEG+CA at different exposure times

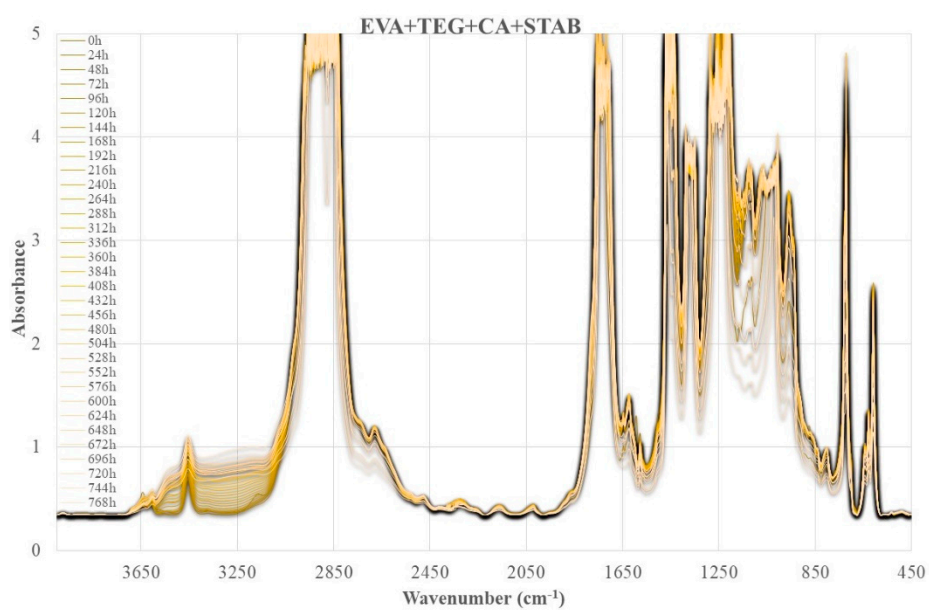

Figure S4. FTIR spectra of EVA+TEG+CA+STAB at different exposure times

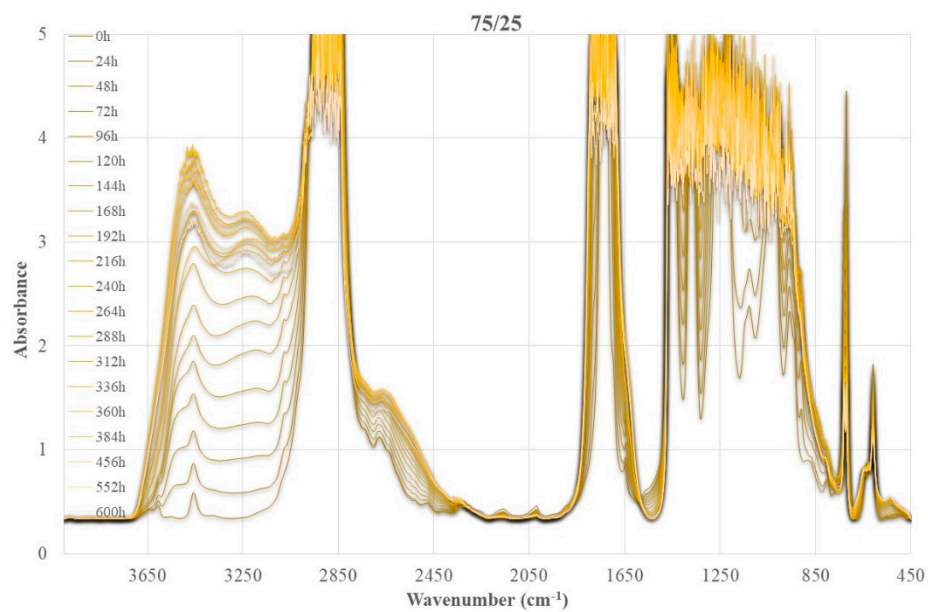

Figure S5. FTIR spectra of EVA/PO=75/25 wt.% at different exposure times

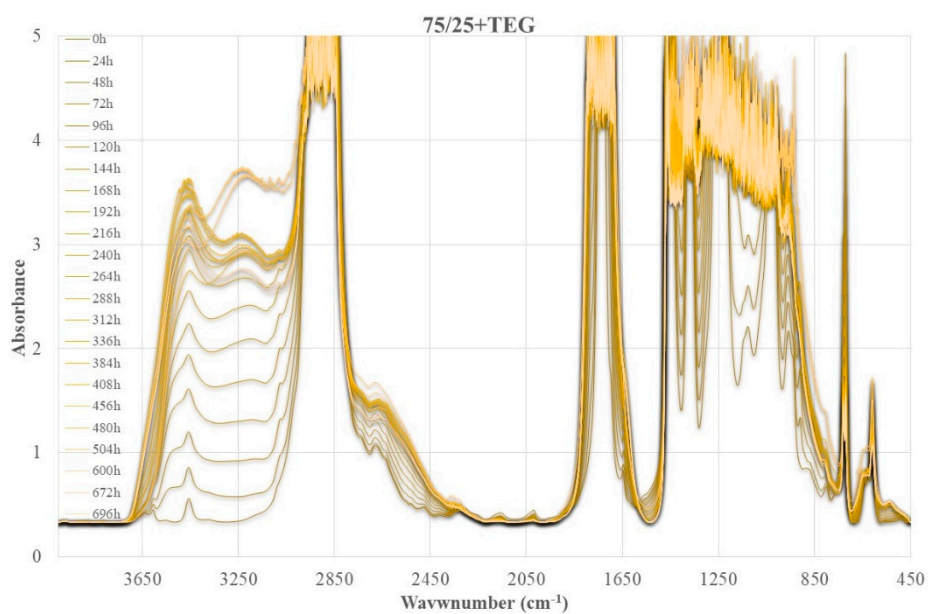

Figure S6. FTIR spectra of EVA/PO=75/25 wt.% + TEG at different exposure times

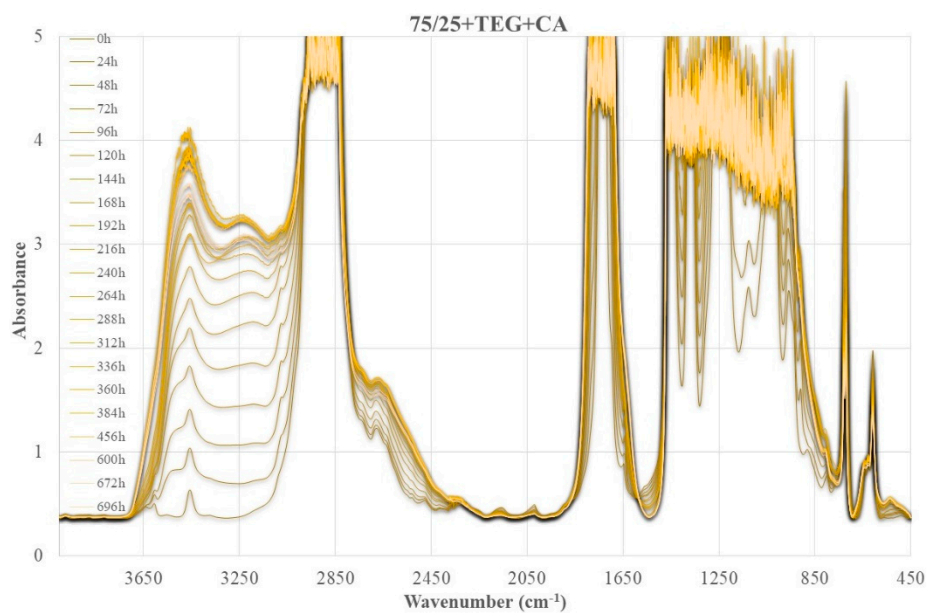

Figure S7. FTIR spectra of EVA/PO=75/25 wt.% +TEG+CA at different exposure times

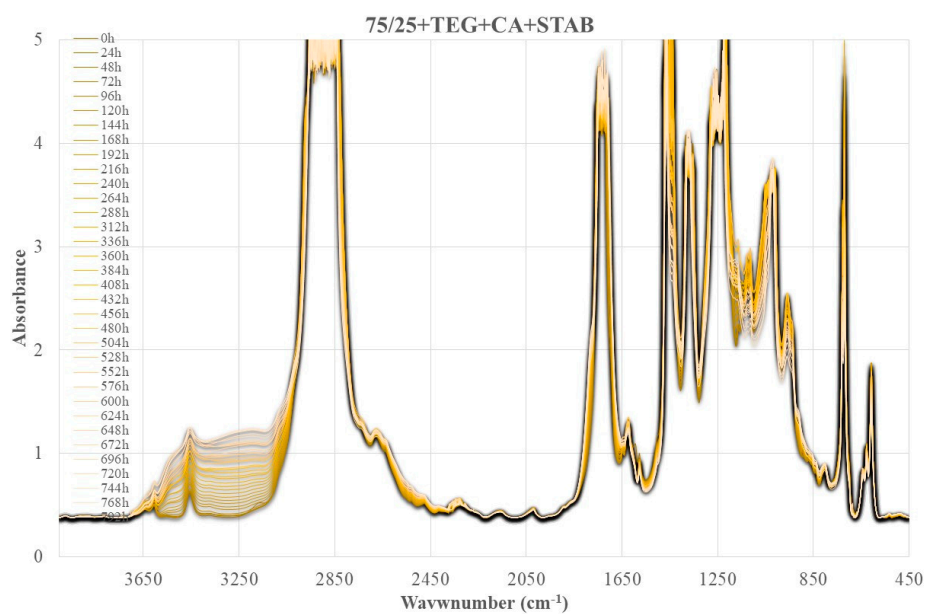

Figure S8. FTIR spectra of EVA/PO=75/25 wt.% +TEG+CA+STAB at different exposure times
